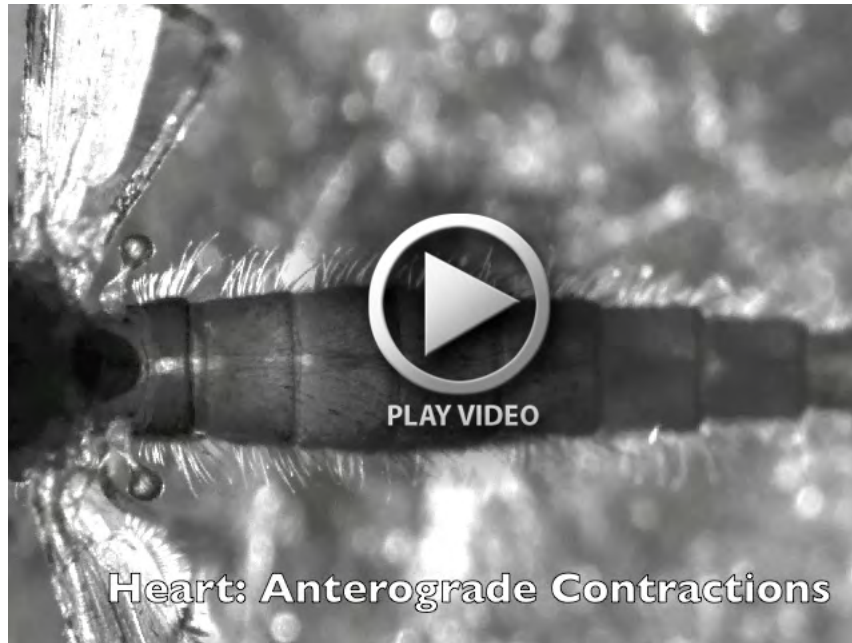

Movie 1. Dorsal view of the mosquito abdomen showing the heart contracting in the anterograde and retrograde directions (real-time; anterior toward the left).
